# Supplementary material
Source: PubMed Central journal article supplement (PMC2644163)
Supplement: 0812859106_0812859106SI.pdf [file 0812859106_0812859106SI.pdf]

# Supporting Information

## Pluznick *et al.* 10.1073/pnas.0812859106

**RT-PCR for AC3 and  $G_{\text{off}}$ .** RNA was isolated from C57BL/6 mouse kidneys by using the Qiagen RNeasy Protocol, and DNase-treated. RNA (2  $\mu\text{g}$ ) was reverse transcribed (RT) using SuperScript II (Invitrogen), or subjected to Mock RT (MRT; in which case 1  $\mu\text{L}$  of water was added instead of 1  $\mu\text{L}$  SuperScript II). In all cases, MRT reactions yielded no bands by PCR. As an additional control for genomic DNA, the primers used for AC3 and  $G_{\text{off}}$  spanned introns (AC3—fwd: TTGGCAGGCTTTCTT-TGTCT, rev: TCTGCAAACAGGATGCTGAC; 462 bp.  $G_{\text{off}}$ —fwd: TACCAGCTGATCGACTGTGC, rev: TGGCATACTC-CGGGAAATAG; 445 bp.). PCRs for AC3 and  $G_{\text{off}}$  were performed using Taq polymerase (Roche) and the products were TOPO-cloned (Invitrogen) and sequenced.

**Western Blot for AC3 and  $G_{\text{off}}$ .** In brief, kidneys were minced in lysis buffer (10 mM Tris-HCl, pH 7.4/250 mM sucrose/1 mM EDTA) containing protease inhibitors (Roche Complete Tablets, 11 697 498 001), then homogenized. Lysates were then centrifuged (10 min at  $800 \times g$  at  $4^\circ\text{C}$ ), and the supernatant was centrifuged again (90 min at  $100,000 \times g$  at  $4^\circ\text{C}$ ). The pellet was then resuspended in lysis buffer. Protein concentration was determined using the Bradford Protein Assay (Bio-Rad). Samples were resolved by SDS/PAGE and transferred to nitrocellulose. The resultant membranes were then blocked and subsequently incubated with antibodies against either AC3 or  $G_{\text{off}}$  (Santa Cruz Biotechnology, sc-588 and sc-385). In control experiments, antibodies were preincubated with an excess of competing peptide. Blots were then probed with a peroxidase-conjugated anti-rabbit secondary antibody, and visualized by chemiluminescence (Amersham Biosciences).

**Immunohistochemistry.** Mouse kidneys (C57BL/6) were perfusion-fixed in 4% periodate-lysine-paraformaldehyde (PLP) and cryosections were obtained. Sections were washed 3 times in TBS, incubated for 5 min in TBS with 1% SDS, and washed in TBS again. After blocking in Goat Serum Dilution Buffer [GSDB; 10% goat serum, 1% Triton X-100, and 10 mM glycine in PBS supplemented with 100  $\mu\text{M}$   $\text{CaCl}_2$  and 1 mM  $\text{MgCl}_2$  (PBS++)], sections were incubated with antibodies for either AC3 or  $G_{\text{off}}$  (rabbit antibodies, used at 1:200 and 1:100, respectively) diluted in GSDB. In control experiments, antibodies were preincubated with an excess of their competing peptides. Sections were then washed in TBS-High Salt (TBS-HS; containing 2.5% NaCl and 0.1% BSA), incubated with anti-rabbit fluorescent antibodies (rhodamine or FITC) for 1 h at room temperature, and washed again in TBS-HS followed by TBS. In other experiments, sections were double stained for  $\text{Na}^+\text{-K}^+\text{-ATPase}$  [ $\alpha 5$  antibody, mouse (1)]. Alternatively, serial sections were stained for AC3 or  $G_{\text{off}}$  and NCC (kind gift from David Ellison, Oregon Health and Science University, Portland, OR), AC3 or  $G_{\text{off}}$  and calbindin, and for AC3 and  $G_{\text{off}}$ . NADPH diaphorase staining was performed as described in Unit 10.6 of *Current Protocols in Toxicology* (2). COX-2 antibody was obtained from Cayman Chemical. To quantitate COX-2 staining, the section was scanned in a systematic pattern and a picture was taken of every macula densa which stained for COX-2. Staining intensity of each COX-2-positive MD was quantitated using Image J, and the mean of the intensities for each animal (3 AC3<sup>+/+</sup> and 4 AC3<sup>-/-</sup>) were used for statistical analysis (*t* test,  $P < 0.05$  considered significant).

**In Vivo Studies.** In one group of animals, plasma samples were collected by supraorbital puncture for measurement of plasma electrolytes and pH balance. In a separate group of mice, plasma samples were obtained by cardiac puncture for HPLC measurement of plasma creatinine. The number of glomeruli was assayed by systematically scanning kidney sections on a light microscope in a prearranged scanning pattern and tallying the number of glomeruli per cortical field of view.

Measurement of cardiovascular parameters and activity by telemetry was done in 3 mice of each genotype by using standard methodology available from a Yale core facility (3). After a recovery period following surgery, telemetry measurements were continually recorded for 5 consecutive days. The values in Table 2 represent the mean values for day (6:30 a.m.–6:30 p.m.) and night (6:30 p.m.–6:30 a.m.), defined by the light schedule of the room where the mice were housed. Activity data were analyzed as the percentage of time that there was an activity count  $>0$  (4).

Renal function studies in anesthetized male mice were performed as described previously (5). In brief, AC3<sup>-/-</sup> animals, AC3<sup>+/+</sup> littermates, or wild-type mice of the same strain were anesthetized by i.p. injection of 100 to 120 mg of Inactin [5-ethyl-5-(L-methylpropyl)-2-thiobarbituric acid (BYK-Guider Pharmazeutika)] per kilogram of body weight. After tracheotomy, the left jugular vein was cannulated for i.v. infusion, a carotid artery was catheterized for monitoring mean arterial pressure (MAP) and blood collection, and the bladder was catheterized for collection of urine. Initially, 0.3% body weight of isotonic saline was given intravenously to replace surgical fluid losses. Subsequently, a priming dose of 5  $\mu\text{Ci}$  of [ $^3\text{H}$ ]methoxy-inulin (New England Nuclear) was given in 0.05 mL isotonic saline followed by a maintenance infusion of 0.9% NaCl and 4 mM of KCl containing 10  $\mu\text{Ci}/\text{mL}$  of [ $^3\text{H}$ ]inulin (infusion rate: 0.41 mL/h). An equilibration period of 60 min was followed by two 30 min collection periods. Blood samples for the measurement of plasma inulin were taken in the middle of each urine collection period.  $\text{Na}^+$  and  $\text{K}^+$  concentrations were measured by flame photometry (type 480 flame photometer, Corning Medical and Scientific). Significant differences were determined using the unpaired *t* test. Details of the method to determine GFR in conscious mice have been published recently (6). FITC-inulin was measured using a fluorescence spectrometer.

Determination of tubuloglomerular feedback was performed as described in detail previously (7). Briefly, anesthetized mice (inactin/ketamine) were given a saline infusion through a jugular vein catheter, and blood pressure was monitored by a femoral artery catheter. The left kidney was exposed, placed in a lucite cup and covered with mineral oil. A beveled micropipette (diameter 7–8  $\mu\text{m}$ ) was inserted into a randomly selected proximal segment, and subsequent segments of the same nephron were identified by downstream flow of stained perfusate (FDC green). Tubular stop-flow pressure proximal to an obstructing wax block was measured as an index of glomerular capillary pressure while flow along the downstream nephron was controlled through a perfusion pipette in the late proximal segment.

Plasma renin concentrations were measured as previously described (8–11); in brief, red cells and plasma were separated by centrifugation and then frozen and stored at  $-20^\circ\text{C}$  until the assay was performed. Plasma renin concentration (PRC) was determined using an RIA (Gammacoat, DiaSorin) to detect the generation of angiotensin (ANG) I after addition of excess



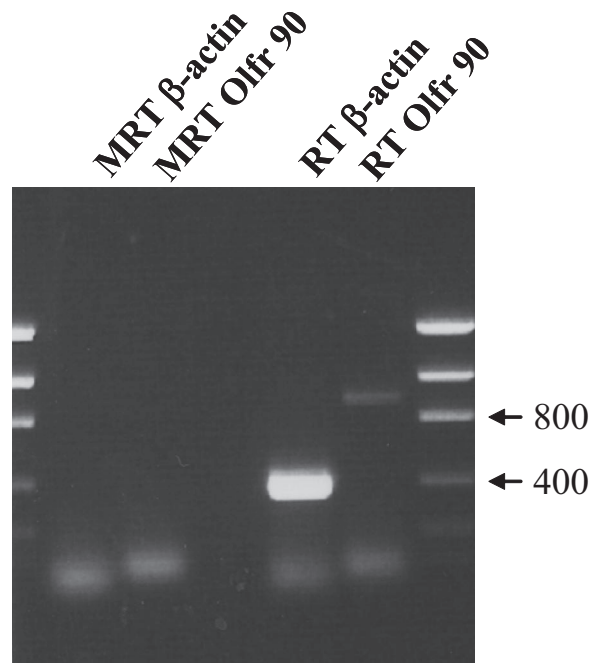

**Fig. S1.** RT-PCR demonstrating the expression of Olfr90 in a macula densa cell line. Mock reverse transcriptase-PCR (MRT) and RT-PCRs were performed for both  $\beta$ -actin and Olfr90. The resultant band for Olfr90 encompassed the entire coding sequence, and was cloned and sequenced and found to be identical to previously published sequences for Olfr90. The expected sizes for  $\beta$ -actin and Olfr90 were 353 and 957 nt, respectively.
